# Supplementary material for: Photo-sensitive hybrids constructed from diphenyliodonium and metal-thiocyanates: photo-induced structure and property transformations
Source: Royal Society of Chemistry journal article supplement (doi:10.1039/d1ce01585k), 2022-01-01
Supplement: d1ce01585k1.pdf [file d1ce01585k1.pdf]

## Supplementary Information

# Photo-sensitive Hybrids Constructed from Diphenyliodonium and Metal-thiocyanates: Photo-induced Structure and Property Transformations

Kai-Yue Song,<sup>a</sup> Zhen-Cong Yang,<sup>a</sup> Pan-Ke Zhou,<sup>a</sup> Lu-Lu Zong,<sup>a</sup> Hao-Hong Li,<sup>\* a,b</sup> Rong  
Jiang,<sup>\*a</sup> Zhi-Rong Chen<sup>a,b</sup>

<sup>a</sup>College of Chemistry, Fuzhou University, Fuzhou, Fujian, 350116, P. R. China

<sup>b</sup>Fujian Science & Technology Innovation Laboratory for Optoelectronic Information of China,  
Fuzhou, Fujian 350108, P. R. China.

### Computation Methods

The geometry of DPI radical was simulated using the Gaussian 09 program package.<sup>1</sup> The calculations were performed by using spin restricted DFT wave functions B3LYP. The 6-31g(d) basis set was used for C, H atoms, while CEP-4g basis set was employed for the I atom.

Table S1 Selected bond lengths (Å) and angles (°) for  $\alpha$ -1 and  $\beta$ -1

| $\alpha$ -1     |           |                 |           |                 |            |
|-----------------|-----------|-----------------|-----------|-----------------|------------|
| Mn(1)-N(1)      | 2.158(4)  | Mn(1)-N(2)      | 2.184(4)  | Mn(1)-N(3)      | 2.155(3)   |
| Mn(1)-N(4)      | 2.167(4)  | Mn(1)-N(5)      | 2.196(3)  | Mn(1)-O(2)      | 2.382(4)   |
| N(3)-Mn(1)-N(4) | 94.48(14) | N(1)-Mn(1)-N(4) | 95.73(16) | N(4)-Mn(1)-N(2) | 95.33(15)  |
| N(4)-Mn(1)-N(5) | 90.24(14) | N(3)-Mn(1)-O(2) | 87.56(14) | N(1)-Mn(1)-O(2) | 82.68(16)  |
| N(2)-Mn(1)-O(2) | 90.84(15) | N(5)-Mn(1)-O(2) | 83.52(15) | N(4)-Mn(1)-O(2) | 173.58(14) |

  

| $\beta$ -1      |          |                 |          |                 |          |
|-----------------|----------|-----------------|----------|-----------------|----------|
| Mn(1)-N(1)      | 2.160(6) | Mn(1)-N(2)      | 2.174(6) | Mn(1)-N(3)      | 2.152(7) |
| Mn(1)-N(4)      | 2.172(6) | Mn(1)-N(5)      | 2.133(7) | Mn(1)-O(1)      | 2.478(9) |
| N(5)-Mn(1)-N(3) | 96.7(3)  | N(5)-Mn(1)-N(1) | 95.3(3)  | N(5)-Mn(1)-N(4) | 96.9(3)  |
| N(5)-Mn(1)-N(2) | 91.5(3)  | N(3)-Mn(1)-O(1) | 81.1(3)  | N(1)-Mn(1)-O(1) | 87.3(3)  |
| N(4)-Mn(1)-O(1) | 88.4(3)  | N(2)-Mn(1)-O(1) | 83.2(3)  | N(5)-Mn(1)-O(1) | 174.3(3) |

Table S2 Selected bond lengths (Å) and angles (°) for  $\alpha$ -2 and  $\beta$ -2

| $\alpha$ -2         |            |                   |            |                     |           |
|---------------------|------------|-------------------|------------|---------------------|-----------|
| Ni(1)-S(1)          | 2.5864(14) | Ni(1)-S(1)#1      | 2.5864(14) | Ni(1)-N(1)#2        | 2.057(5)  |
| Ni(1)-N(1)#3        | 2.057(5)   | Ni(1)-N(2)        | 2.024(5)   | Ni(1)-N(2)#1        | 2.024(5)  |
| N(2)#1-Ni(1)-S(1)#1 | 87.88(13)  | N(2)-Ni(1)-S(1)#1 | 92.12(13)  | N(1)#2-Ni(1)-S(1)#1 | 88.26(13) |
| N(1)#3-Ni(1)-S(1)#1 | 91.74(13)  | N(2)#1-Ni(1)-S(1) | 92.12(13)  | N(2)-Ni(1)-S(1)     | 87.88(13) |

|                                                               |           |                   |           |                   |            |
|---------------------------------------------------------------|-----------|-------------------|-----------|-------------------|------------|
| N(1)#2-Ni(1)-S(1)                                             | 91.74(13) | N(1)#3-Ni(1)-S(1) | 88.26(13) | S(1)#1-Ni(1)-S(1) | 180.000(1) |
| Symmetry code: #1 -x,-y+2,-z+2; #2 -x+1,-y+2,-z+2; #3 x-1,y,z |           |                   |           |                   |            |

**$\beta$ -2**

|                               |            |                   |            |                   |            |
|-------------------------------|------------|-------------------|------------|-------------------|------------|
| Ni(1)-S(1)                    | 2.6106(16) | Ni(1)-S(1)#1      | 2.6106(16) | Ni(1)-N(1)        | 2.025(5)   |
| Ni(1)-N(1)#1                  | 2.025(5)   | Ni(1)-N(2)        | 2.058(5)   | Ni(1)-N(2)#1      | 2.058(5)   |
| N(1)#1-Ni(1)-S(1)#1           | 88.02(16)  | N(1)-Ni(1)-S(1)#1 | 91.98(16)  | N(2)-Ni(1)-S(1)#1 | 88.31(15)  |
| N(2)#1-Ni(1)-S(1)#1           | 91.69(15)  | N(1)#1-Ni(1)-S(1) | 91.98(16)  | N(1)-Ni(1)-S(1)   | 88.02(16)  |
| N(2)-Ni(1)-S(1)               | 91.69(15)  | N(2)#1-Ni(1)-S(1) | 88.31(15)  | S(1)#1-Ni(1)-S(1) | 180.000(1) |
| Symmetry code: -x+1,-y+2,-z+1 |            |                   |            |                   |            |

**Table S3 Selected bond lengths (Å) and angles (°) for  $\alpha$ -3 and  $\beta$ -3**

**$\alpha$ -3**

|                                |          |                     |          |                   |           |
|--------------------------------|----------|---------------------|----------|-------------------|-----------|
| Cd(1)-S(1)                     | 2.768(3) | Cd(1)-S(4)          | 2.796(3) | Cd(1)-N(1)        | 2.393(10) |
| Cd(1)-N(2)                     | 2.283(8) | Cd(1)-N(3)          | 2.270(7) | Cd(1)-N(4)        | 2.308(9)  |
| Cd(2)-S(6)                     | 2.773(3) | Cd(2)-S(6)#1        | 2.773(3) | Cd(2)-N(5)        | 2.310(8)  |
| Cd(2)-N(5)#1                   | 2.310(8) | Cd(2)-N(6)#1        | 2.272(7) | Cd(2)-N(6)        | 2.272(7)  |
| N(3)-Cd(1)-N(1)                | 89.8(3)  | N(2)-Cd(1)-N(1)     | 89.0(3)  | N(4)-Cd(1)-N(1)   | 93.8(3)   |
| N(1)-Cd(1)-S(1)                | 94.0(3)  | N(3)-Cd(1)-S(4)     | 89.8(3)  | N(2)-Cd(1)-S(4)   | 91.5(3)   |
| N(4)-Cd(1)-S(4)                | 90.8(2)  | N(1)-Cd(1)-S(4)     | 175.4(3) | S(6)-Cd(2)-S(6)#1 | 180.0     |
| N(6)#1-Cd(2)-S(6)              | 90.1(3)  | N(6)-Cd(2)-S(6)     | 89.9(3)  | N(5)#1-Cd(2)-S(6) | 85.9(2)   |
| N(5)-Cd(2)-S(6)                | 94.1(2)  | N(6)#1-Cd(2)-S(6)#1 | 89.9(3)  | N(6)-Cd(2)-S(6)#1 | 90.1(3)   |
| N(5)#1-Cd(2)-S(6)#1            | 94.1(2)  | N(5)-Cd(2)-S(6)#1   | 85.9(2)  |                   |           |
| Symmetry code: #1 -x,-y+2,-z+1 |          |                     |          |                   |           |

**$\beta$ -3**

|                                                                 |           |                     |           |                     |            |
|-----------------------------------------------------------------|-----------|---------------------|-----------|---------------------|------------|
| Cd(1)-N(1)                                                      | 2.166(16) | Cd(1)-N(1)#1        | 2.166(16) | Cd(1)-N(2)          | 2.259(9)   |
| Cd(1)-N(2)#1                                                    | 2.259(9)  | Cd(1)-S(1)#2        | 2.909(5)  | Cd(1)-S(1)#3        | 2.909(5)   |
| N(1)-Cd(1)-S(1)#2                                               | 87.2(5)   | N(1)#1-Cd(1)-S(1)#2 | 92.8(5)   | N(2)-Cd(1)-S(1)#2   | 92.5(3)    |
| N(2)#1-Cd(1)-S(1)#2                                             | 87.5(3)   | N(1)-Cd(1)-S(1)#3   | 92.8(5)   | N(1)#1-Cd(1)-S(1)#3 | 87.2(5)    |
| N(2)-Cd(1)-S(1)#3                                               | 87.5(3)   | N(2)#1-Cd(1)-S(1)#3 | 92.5(3)   | S(1)#2-Cd(1)-S(1)#3 | 180.000(1) |
| Symmetry code: #1 -x+2,-y+2,-z+1; #2 x+1,y,z; #3 -x+1,-y+2,-z+1 |           |                     |           |                     |            |

**Table S4 Hydrogen bond details**

|             | D-H               | d(H...A) | d(D...A)  | $\angle$ DHA | Symmetry Code   |
|-------------|-------------------|----------|-----------|--------------|-----------------|
| $\alpha$ -1 | O(2)-H(2B)···O(1) | 1.86     | 2.751(4)  | 145          |                 |
| $\beta$ -1  | O(1)-H(1B)···O(2) | 1.81     | 2.66(5)   | 151          |                 |
| $\alpha$ -2 | C(4)-H(4)···S(2)  | 2.87     | 3.799(6)  | 176          | 1+x,-1+y,z      |
| $\beta$ -2  | C(4)-H(4)···S(2)  | 2.90     | 3.827     | 174          | 1+x,-1+y,z      |
| $\alpha$ -3 | C(4)-H(4)···S(3)  | 2.84     | 3.764(15) | 175          | -x,-1/2+y,1/2-z |
| $\beta$ -3  | C(2)-H(2)···S(1)  | 2.87     | 3.388(13) | 117          |                 |

**Table S5 C-H... $\pi$  interaction parameters**

|             | C-H... $\pi$                                             | C...C <sub>g</sub> /Å | H...C <sub>g</sub> /Å | $\angle$ (C-H...C <sub>g</sub> ) <sup>o</sup> | Symmetry transformation |
|-------------|----------------------------------------------------------|-----------------------|-----------------------|-----------------------------------------------|-------------------------|
| $\alpha$ -1 | C(3)-H(3)···C <sub>g</sub> (1)                           | 3.805(6)              | 2.93                  | 157                                           | 1-x,1-y,1-z             |
|             | C <sub>g</sub> (1): C(13)→C(14)→C(15)→C(16)→C(17)→C(18)→ |                       |                       |                                               |                         |
| $\beta$ -1  | C(17)-H(17)···C <sub>g</sub> (2)                         | 3.886(15)             | 2.99                  | 163                                           | 2-x,1-y,1-z             |

|            |                                                          |           |      |     |                   |
|------------|----------------------------------------------------------|-----------|------|-----|-------------------|
|            | C <sub>g</sub> (1): C(7)→C(8)→C(9)→C(10)→C(11)→C(12)→    |           |      |     |                   |
|            | C(10)-H(10)⋯C <sub>g</sub> (1)                           | 3.710(7)  | 2.92 | 144 | 3/2-x,1/2+y,1/2-z |
| <b>α-2</b> | C(12)-H(12)⋯C <sub>g</sub> (1)                           | 3.714(7)  | 2.80 | 168 | -1+x,y,z          |
|            | C <sub>g</sub> (1): C(1)→C(2)→C(3)→C(4)→C(5)→C(6)→       |           |      |     |                   |
| <b>β-2</b> | C(8)-H(8)⋯C <sub>g</sub> (1)                             | 3.766(8)  | 2.84 | 171 | -1+x,y,z          |
|            | C <sub>g</sub> (1): C(1)→C(2)→C(3)→C(4)→C(5)→C(6)→       |           |      |     |                   |
|            | C(12)-H(12)⋯C <sub>g</sub> (1)                           | 3.869(13) | 2.95 | 172 |                   |
|            | C <sub>g</sub> (1): C(13)→C(14)→C(15)→C(16)→C(17)→C(18)→ |           |      |     |                   |
| <b>α-3</b> | C(28)-H(28)⋯C <sub>g</sub> (2)                           | 3.774(16) | 2.97 | 145 | -1-x,-1/2+y,1/2-z |
|            | C <sub>g</sub> (2): C(19)→C(20)→C(21)→C(22)→C(23)→C(24)→ |           |      |     |                   |
|            | C(30)-H(30)⋯C <sub>g</sub> (3)                           | 3.790(15) | 2.86 | 175 | -1+x,y,z          |
|            | C <sub>g</sub> (3): C(1)→C(2)→C(3)→C(4)→C(5)→C(6)→       |           |      |     |                   |
| <b>β-3</b> | C(8)-H(8)⋯C <sub>g</sub> (1)                             | 3.907(14) | 2.99 | 170 | 1+x,y,z           |
|            | C <sub>g</sub> (1): C(1)→C(2)→C(3)→C(4)→C(5)→C(6)→       |           |      |     |                   |

**Table S6 Secondary hypervalent I(III)⋯S interactions (lengths in Å)**

| <b>α-1</b>                                                                     |       | <b>β-1</b>  |       |
|--------------------------------------------------------------------------------|-------|-------------|-------|
| I(1)⋯S(1)                                                                      | 3.249 | I(1)⋯S(2)#1 | 3.192 |
| I(1)⋯S(1)#1                                                                    | 3.340 | I(1)⋯S(5)#1 | 3.289 |
| I(2)⋯S(4)                                                                      | 3.267 | I(2)⋯S(3)   | 3.355 |
| I(2)⋯S(5)                                                                      | 3.173 | I(2)⋯S(3)#1 | 3.299 |
| I(3)⋯S(2)                                                                      | 3.297 | I(3)⋯S(1)   | 3.269 |
| I(3)⋯S(3)                                                                      | 3.227 | I(3)⋯S(4)   | 3.347 |
| Symmetry Code: #1: 1-x,1-y,1-z                                                 |       |             |       |
| <b>α-2</b>                                                                     |       | <b>β-2</b>  |       |
| I(1)⋯S(1)#1                                                                    | 3.385 | I(1)⋯S(1)   | 3.410 |
| I(1)⋯S(2)#2                                                                    | 3.159 | I(1)⋯S(2)#3 | 3.176 |
| Symmetry Code: #1: 1/2-x,-1/2+y,3/2-z; #2: -1/2+x,3/2-y,-1/2+z; #3: -x,2-y,1-z |       |             |       |
| <b>α-3</b>                                                                     |       | <b>β-3</b>  |       |
| I(1)⋯S(4)#1                                                                    | 3.411 | I(1)⋯S(1)   | 3.416 |
| I(1)⋯S(5)#1                                                                    | 3.200 | I(1)⋯S(2)   | 3.193 |
| I(2)⋯S(2)                                                                      | 3.188 |             |       |
| I(2)⋯S(6)                                                                      | 3.523 |             |       |
| I(3)⋯S(3)#2                                                                    | 3.171 |             |       |
| Symmetry Code: #1: -x,2-y,1-z; #2: -1-x,2-y,1-z                                |       |             |       |

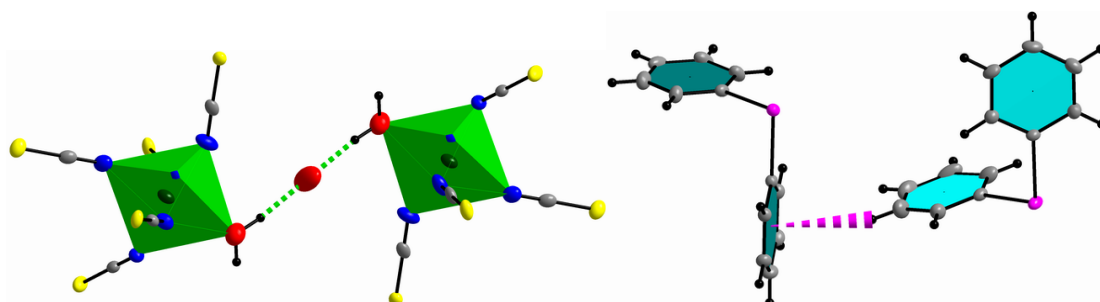

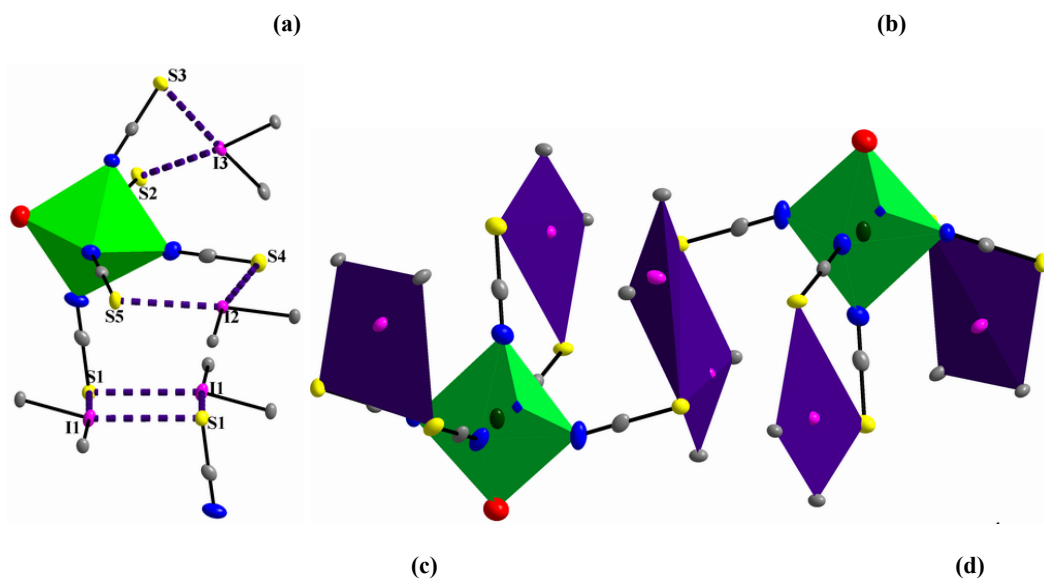

Fig. S1 (a)  $\{[\text{Mn}(\text{SCN})_5(\text{H}_2\text{O})]_2\}^{6-} \cdot \text{H}_2\text{O}$  dimer based on O-H $\cdots$ O hydrogen bond; (b) DPI<sup>+</sup> dimer based on C-H $\cdots$  $\pi$  interaction of  $\alpha$ -1; (c) the structure of  $(\text{DPI})_3[\text{Mn}(\text{SCN})_5(\text{H}_2\text{O})]$  based on the secondary I(III) $\cdots$ S contacts in  $\alpha$ -1; (d)  $(\text{DPI})_3[\text{Mn}(\text{SCN})_5(\text{H}_2\text{O})]$  dimer based on bridged DPI<sup>+</sup> in  $\alpha$ -1 (other C and H atoms on benzene rings were omitted for clarity, green: MnN<sub>5</sub>O octahedron, purple: IS<sub>2</sub>C<sub>2</sub> planar square)

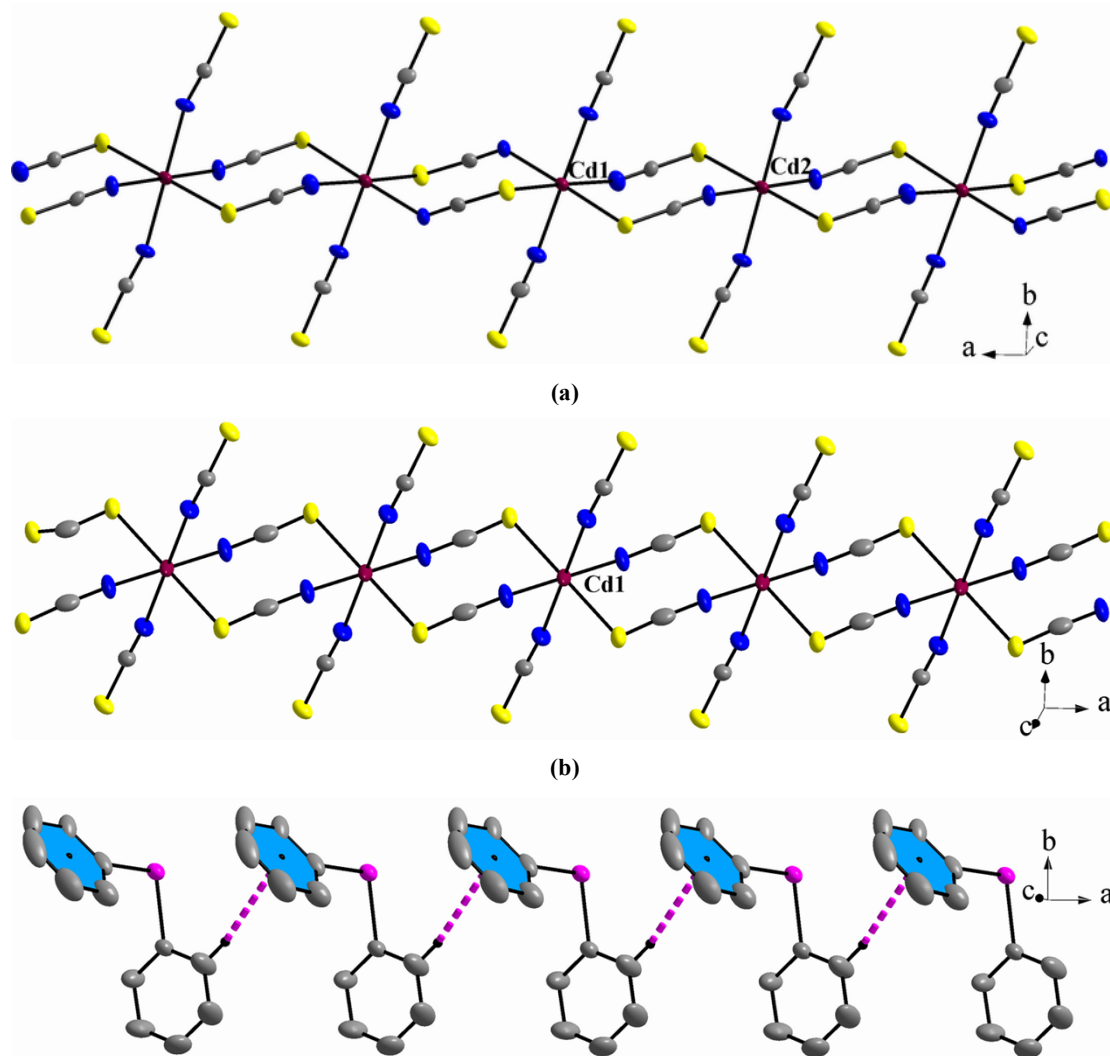

(c)

Fig. S2 (a) 1-D zigzag  $\{[\text{Cd}(\text{SCN})_4]_3^{6-}\}_n$  anionic chain of  $\alpha$ -3; (b) 1-D  $\{[\text{Cd}(\text{SCN})_4]^{2-}\}_n$  of  $\beta$ -3; (c) 1-D  $(\text{DPI})_n^{n+}$  chain based on  $\text{C-H}\cdots\pi$  interaction in  $\beta$ -3

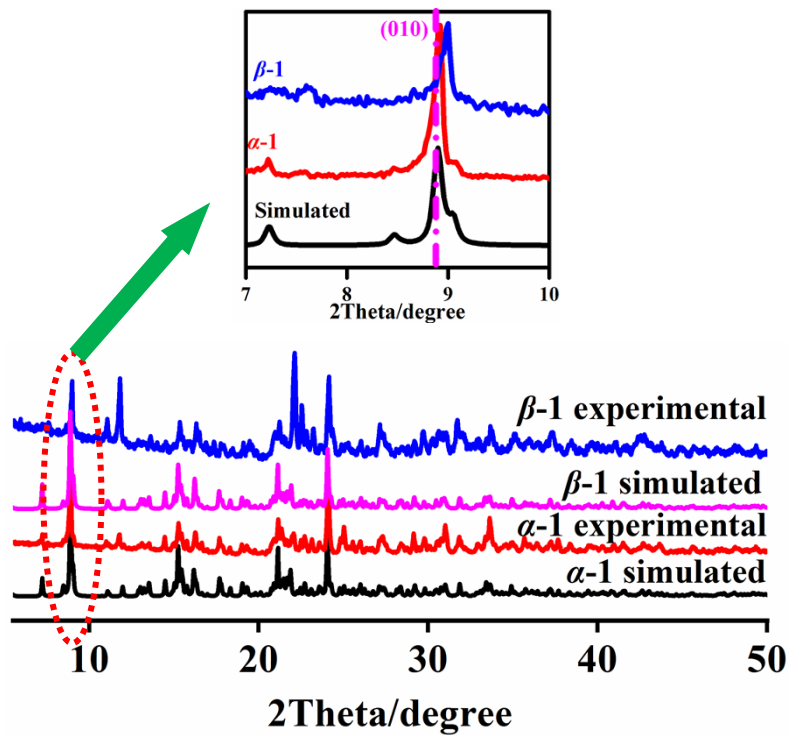

(a)

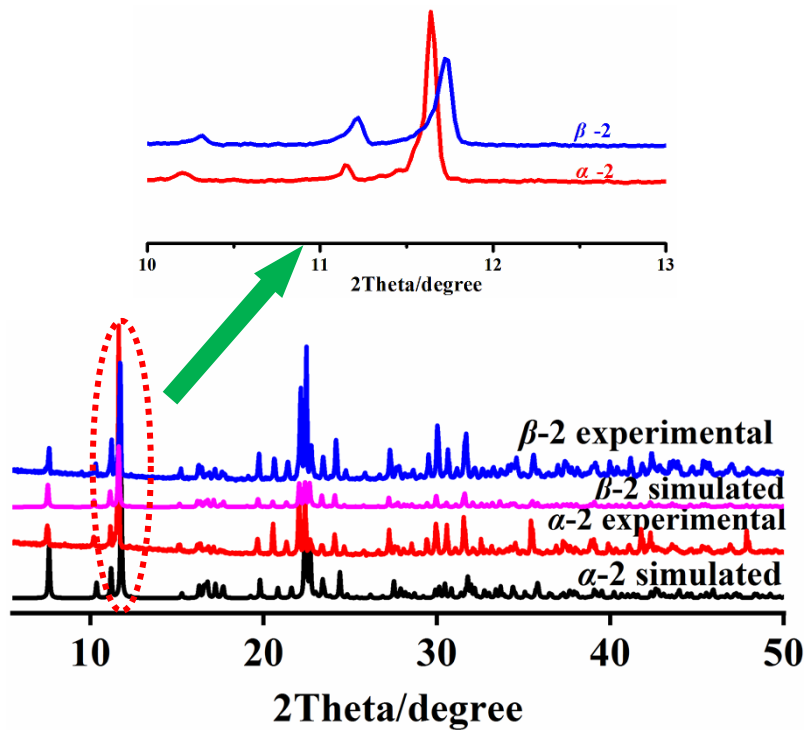

(b)

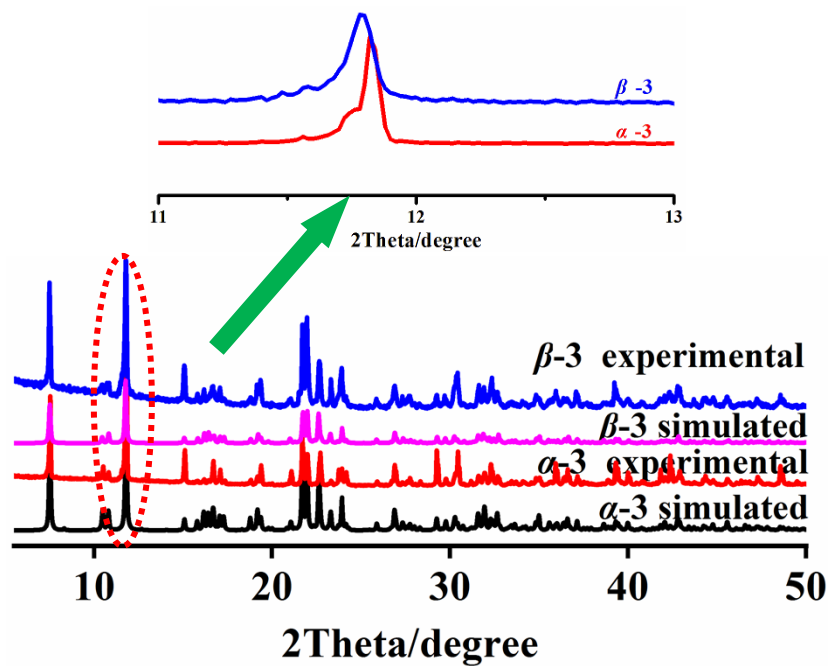

(c)

Fig. S3 Powder X-ray diffraction (PXRD) patterns of three hybrids before and after irradiating: (a) 1; (b) 2;

(c) 3

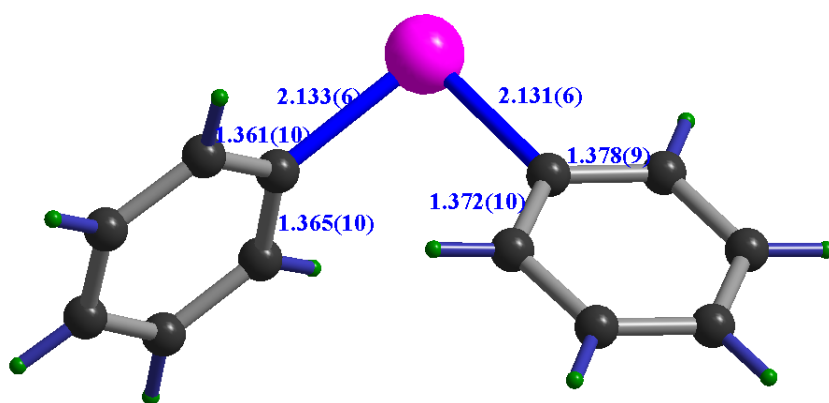

(a)

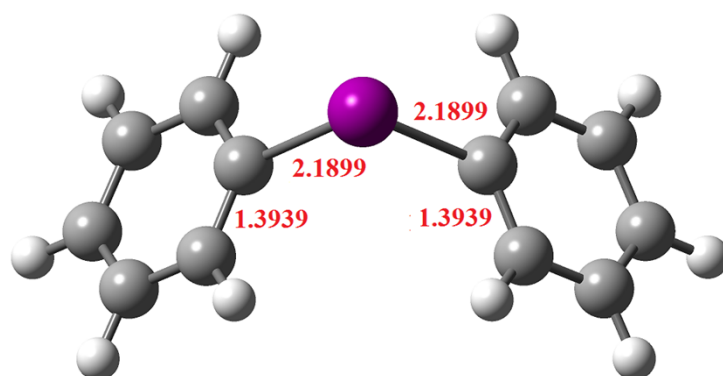

(b)

Fig. S4 The geometry of DPI<sup>+</sup> cation: (a) in  $\beta$ -2; (b) the calculated model based on DFT calculation

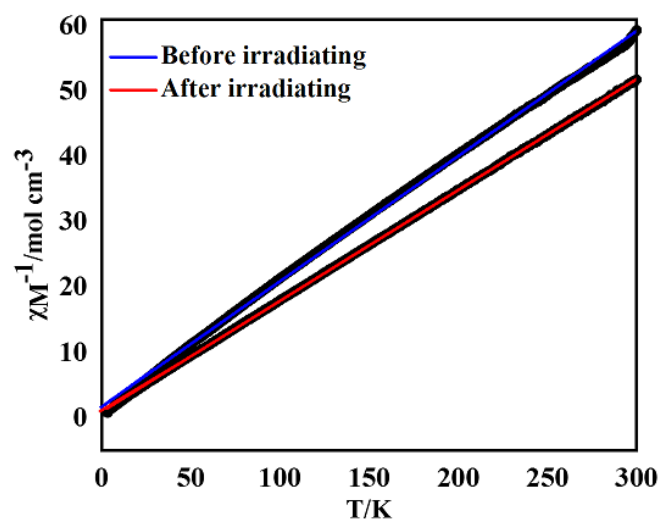

(a)

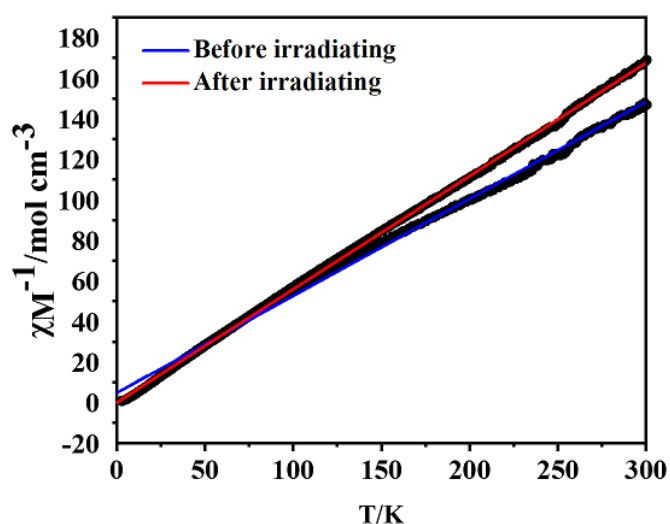

(b)

Fig. S5 The  $1/\chi_M$  vs. T plots: (a)  $\alpha$ -1; (b)  $\alpha$ -2. The red and blue lines represent the fits

## References

- 1 M. J. Frisch, G. W. Trucks, H. B. Schlegel, G. E. Scuseria, M. A. Robb, J. R. Cheeseman, G. Scalmani, V. Barone, B. Mennucci, G. A. Petersson, H. Nakatsuji, M. Caricato, X. Li, H. P. Hratchian, A. F. Izmaylov, J. Bloino, G. Zheng, J. L. Sonnenberg, M. Hada, M. Ehara, K. Toyota, R. Fukuda, J. Hasegawa, M. Ishida, T. Nakajima, Y. Honda, O. Kitao, H. Nakai, T. Vreven, Jr. J. A. Montgomery, J. E. Peralta, F. Ogliaro, M. Bearpark, J. J. Heyd, E. Brothers, K. N. Kudin, V. N. Staroverov, T. Keith, R. Kobayashi, J. Normand, K. Raghavachari, A. Rendell, J. C. Burant, S. S. Iyengar, J. Tomasi, M. Cossi, N. Rega, J. M. Millam, M. Klene, J. E. Knox, J. B. Cross, V. Bakken, C. Adamo, J. Jaramillo, R. Gomperts, R. E. Stratmann, O. Yazyev, A. J. Austin, R. Cammi, C. Pomelli, J. W. Ochterski, R. L. Martin, K. Morokuma, V. G. Zakrzewski, G. A. Voth,

P. Salvador, J. J. Dannenberg, S. Dapprich, A. D. Daniels, O. Farkas, J. B. Foresman, J. V. Ortiz, J. Cioslowski and D. J. Fox, Gaussian 09, Revision A01, Gaussian, Inc., Wallingford, CT, 2009.
